# Supplementary material for: Ultrasound Molecular Imaging of Atherosclerosis for Early Diagnosis and Therapeutic Evaluation through Leucocyte-like Multiple Targeted Microbubbles
Source: PubMed Central journal article supplement — Theranostics. 2018 Feb 14;8(7):1879–91. doi: 10.7150/thno.22070 (PMC5858506; doi:10.7150/thno.22070), 2018-02-14
Supplement: thnov08p1879s1.pdf [file thnov08p1879s1.pdf]

## Supplementary Materials

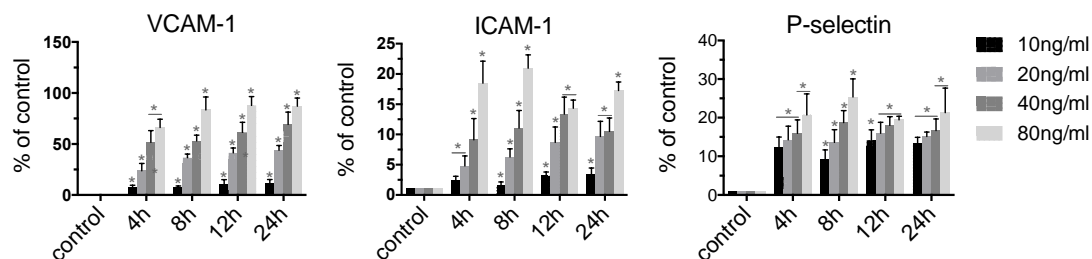

**Figure S1.** Expression detection of the target receptors on the inflammatory cells stimulated with TNF- $\alpha$ . Expression of VCAM-1, ICAM-1 and P-selectin on bEnd.3 cells which were stimulated by TNF- $\alpha$  with different concentration and incubating time were analyzed by flow cytometry. \* $P < 0.05$ .

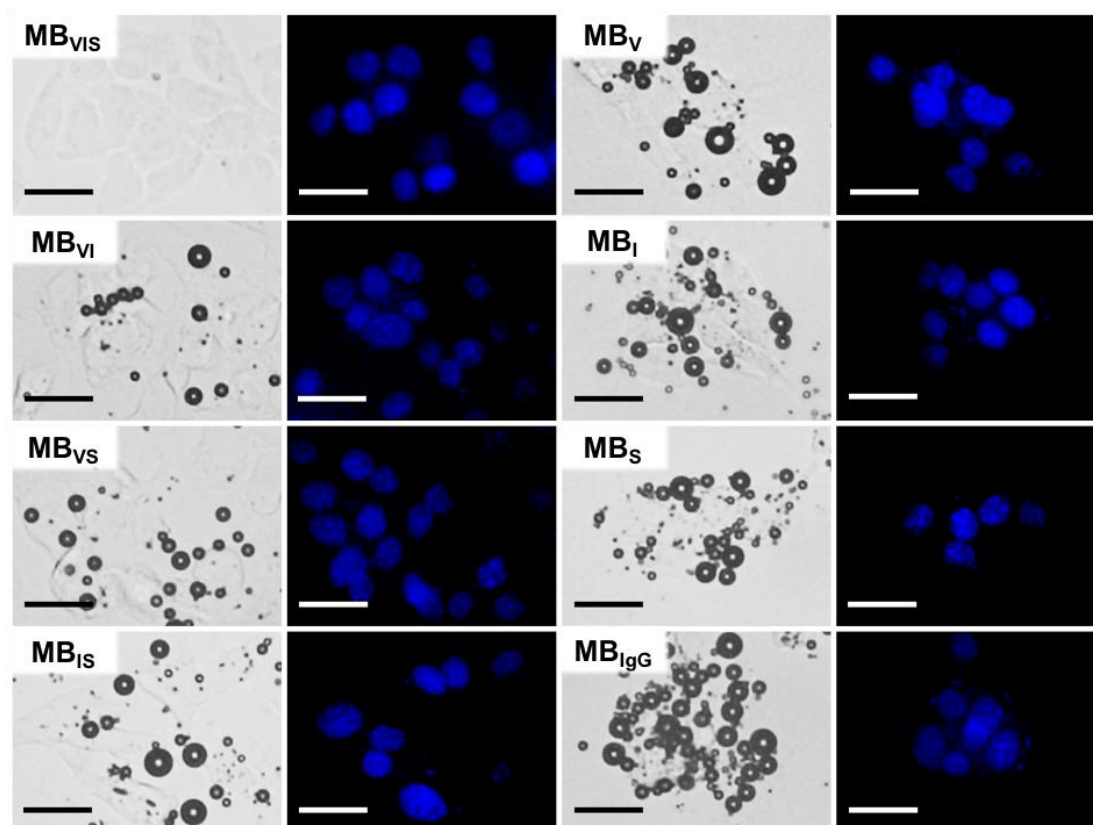

**Figure S2.** In vitro dynamic adhesion of MBs. Representative micrographs after incubating bEnd.3 cells with targeted MBs for 4 min with a flow velocity at 4 dynes/cm<sup>2</sup> shear stress (bar = 50  $\mu\text{m}$ ).

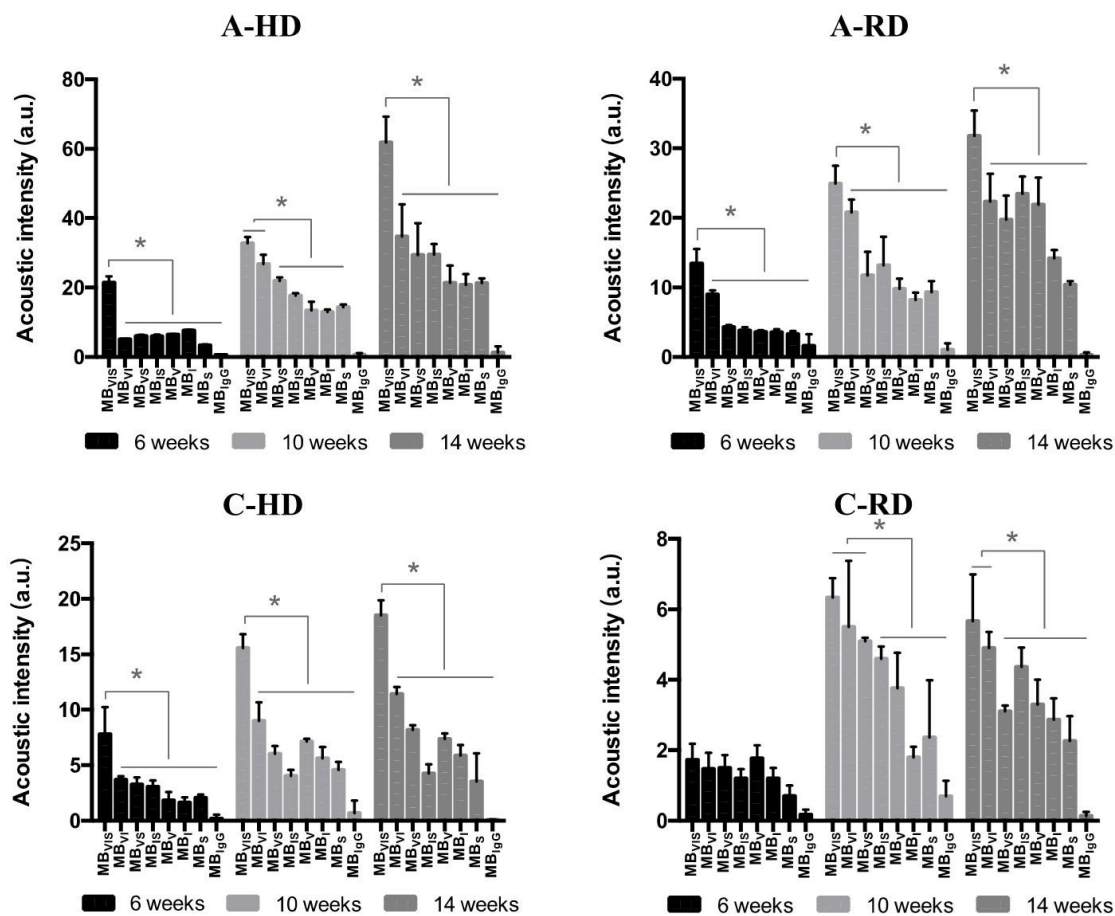

**Figure S3. In vivo results of UMI performed with MB<sub>VIS</sub> and control MBs in ascending aorta.** Mice from four different groups were detected by UMI at 6-, 10- or 14-week feeding time point, respectively. A good performance of MB<sub>VIS</sub> could be discovered. Molecular imaging effect of targeted MBs had a significant enhancement than that of MB<sub>IgG</sub> (\*: P<0.05), and MB<sub>VIS</sub> had better imaging effect than that of the single- and dual-targeted MBs in the most time points and animal groups (\*: P<0.05). The signal intensity of all targeted MBs showed an increasing trend along with feeding time.

**Table 1. Particle size of the targeted MBs and control isotype MBs.**

| Sample            | Number-weighted diameter ( $\mu\text{m}$ ) |                 |                 |
|-------------------|--------------------------------------------|-----------------|-----------------|
|                   | Mean $\pm$ SD                              | Median $\pm$ SD | Mode $\pm$ SD   |
| MB <sub>IgG</sub> | 2.34 $\pm$ 0.50                            | 1.78 $\pm$ 0.28 | 1.75 $\pm$ 0.06 |
| MB <sub>V</sub>   | 2.05 $\pm$ 0.29                            | 1.59 $\pm$ 0.21 | 1.61 $\pm$ 0.22 |
| MB <sub>I</sub>   | 2.01 $\pm$ 0.17                            | 1.62 $\pm$ 0.03 | 1.75 $\pm$ 0.06 |
| MB <sub>S</sub>   | 2.07 $\pm$ 0.34                            | 1.60 $\pm$ 0.09 | 1.71 $\pm$ 0.06 |
| MB <sub>VI</sub>  | 2.19 $\pm$ 0.56                            | 1.71 $\pm$ 0.06 | 1.75 $\pm$ 0.30 |
| MB <sub>VS</sub>  | 2.13 $\pm$ 0.17                            | 1.63 $\pm$ 0.18 | 1.57 $\pm$ 0.13 |
| MB <sub>IS</sub>  | 2.33 $\pm$ 0.52                            | 1.7 $\pm$ 0.06  | 1.81 $\pm$ 0.25 |
| MB <sub>VIS</sub> | 2.40 $\pm$ 0.45                            | 1.63 $\pm$ 0.18 | 1.69 $\pm$ 0.18 |

**Table 2. The ligand amount conjugated onto the microbubble surface.**

|                   | VCAM-1 antibody<br>( $10^5$ / microbubble ) | ICAM-1 antibody<br>( $10^5$ / microbubble ) | Sialyl Lewis-X<br>polymer<br>( $10^5$ / microbubble ) |
|-------------------|---------------------------------------------|---------------------------------------------|-------------------------------------------------------|
| MB <sub>V</sub>   | 12.9 $\pm$ 0.87                             | --                                          | --                                                    |
| MB <sub>I</sub>   | --                                          | 13.68 $\pm$ 0.68                            | --                                                    |
| MB <sub>S</sub>   | --                                          | --                                          | 2.25 $\pm$ 0.19                                       |
| MB <sub>VI</sub>  | 5.71 $\pm$ 0.21                             | 6.98 $\pm$ 0.36                             | --                                                    |
| MB <sub>VS</sub>  | 4.71 $\pm$ 0.18                             | --                                          | 0.91 $\pm$ 0.04                                       |
| MB <sub>IS</sub>  | --                                          | 6.31 $\pm$ 0.73                             | 1.29 $\pm$ 0.40                                       |
| MB <sub>VIS</sub> | 4.26 $\pm$ 0.27                             | 5.51 $\pm$ 0.29                             | 0.93 $\pm$ 0.04                                       |

Note: "--" means that the ligand amount was not detected.

**Table S3. Serum lipid profile of A-HD mice under atorvastatin or placebo treatment.**

| ApoE <sup>-/-</sup> HD mice |          | HDLC(mmol/L)            | LDLC(mmol/L)            | TG(mmol/L)               | T-CHO(mmol/L)            |
|-----------------------------|----------|-------------------------|-------------------------|--------------------------|--------------------------|
| Control                     | 6 weeks  | 1.4 ±0.55               | 1.15 ±0.26              | 1.36 ±0.44               | 12.52 ±2.95              |
|                             | 10 weeks | 2.13 ±1.13              | 2.88 ±1.38              | 2.67 ±1.72               | 22.21 ±3.31 <sup>#</sup> |
| Ator                        | 14 weeks | 2.45 ±0.61 <sup>#</sup> | 2.62 ±0.57 <sup>*</sup> | 4.27 ±0.48 <sup>*#</sup> | 15.31 ±3.95 <sup>#</sup> |
|                             | 10 weeks | 2.13 ±1.13              | 2.88 ±1.38              | 2.67 ±1.72               | 22.21 ±3.31              |
| Placebo                     | 14 weeks | 6.34 ±0.97 <sup>*</sup> | 5.71 ±1.92 <sup>*</sup> | 6.61 ±1.43 <sup>*</sup>  | 25.53 ±5.15 <sup>*</sup> |

Note: HDLC is for high density lipoprotein cholesterol, LDLC for low density lipoprotein cholesterol, TG for triglyceride, T-CHO for total cholesterol. They were measured by enzymatic assays. \*: P<0.05, compare with the serum lipid value of six-week-feeding A-HD mice. #: P <0.05, compare with the serum lipid value of placebo treated groups.
